# Supplementary material for: Intraindividual variation in core microbiota in peri-implantitis and periodontitis
Source: PubMed Central journal article supplement — Sci Rep. 2014 Oct 13;4:6602. doi: 10.1038/srep06602 (PMC4194447; doi:10.1038/srep06602), 2014-10-13
Supplement: srep06602-s1.pdf [file srep06602-s1.pdf]

# **Intraindividual variation in core microbiota in peri-implantitis and periodontitis**

Noriko Maruyama<sup>1</sup>, Fumito Maruyama<sup>2</sup>, Yasuo Takeuchi<sup>1</sup>, Chihiro Aikawa<sup>2</sup>, Yuichi Izumi<sup>1</sup>, Ichiro Nakagawa<sup>2</sup>

<sup>1</sup>Department of Periodontology, Graduate School of Medical and Dental Sciences, Tokyo Medical and Dental University <sup>2</sup>Department of Microbiology, Graduate School of Medicine, Kyoto University

Correspondence and requests for materials should be addressed to F.M. (maruyama.fumito.5e@kyoto-u.ac.jp) or to Y.T. (takeuchi.peri@tmd.ac.jp)

## Supplementary Figures

**Supplementary Figure S1. Number of taxonomic differences between peri-implantitis and periodontitis samples.** Pie charts show the number of taxa that were different at the phylum (a), genus (b), and species (c) levels. The portions represent the taxa present at the peri-implantitis (red), periodontitis (blue), or both (brown) sites.

**Supplementary Figure S2. The most abundant genera in peri-implantitis and periodontitis.** Genera with >0.1% abundance in either peri-implantitis or periodontitis samples, which were the more abundant genera in peri-implantitis (a) and periodontitis (b). The taxonomic assignments were made using the Ribosomal Database Project (RDP) classifier. The taxonomic names were based on results from the RDP classifier. Statistical differences were calculated by Wilcoxon signed rank tests. \* $P < 0.05$  and  $q < 0.1$ .

**Supplementary Figure S3. Comparison of the alpha diversity indexes in peri-implantitis and periodontitis.** (a–c) Scatter plots are shown with black spots and the bars show the mean and standard deviation, respectively. (a) Shannon Index representing species richness and evenness. (b) Operational taxonomic units (OTUs) generated with a minimum pairwise identity of 97%. (c) Chao1 is used to estimate species richness. (d) Rarefaction curves of the number of OTUs in each sample.

**Supplementary Figure 4. Comparison of the characteristics of constituent species in peri-implantitis and periodontitis** (a) Overall abundance of anaerobic and aerobic bacteria in the peri-implantitis and periodontitis samples. (b) Overall abundance of the gram-negative and gram-positive bacteria. (c) Percentage of cultivated species with  $\geq 98.5\%$  similarity by sample type. Statistical differences were calculated using paired t-tests.

\*  $P < 0.05$ .

# Supplementary Figure S1

**(a)**

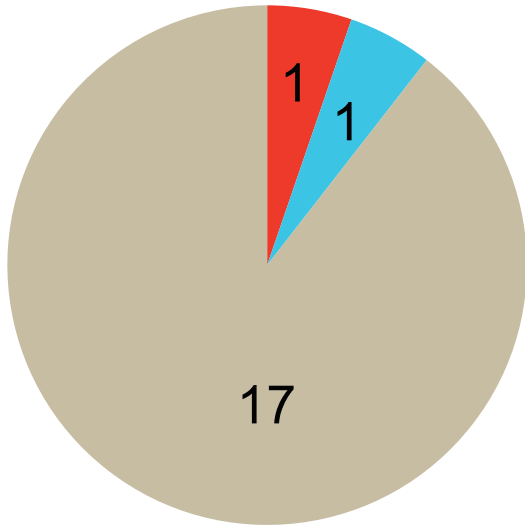

**(b)**

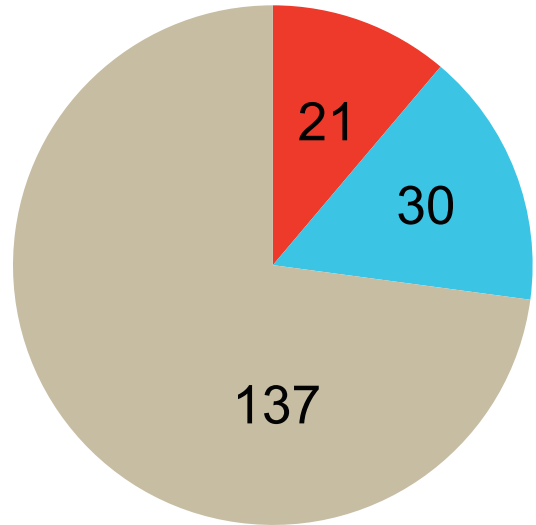

**(c)**

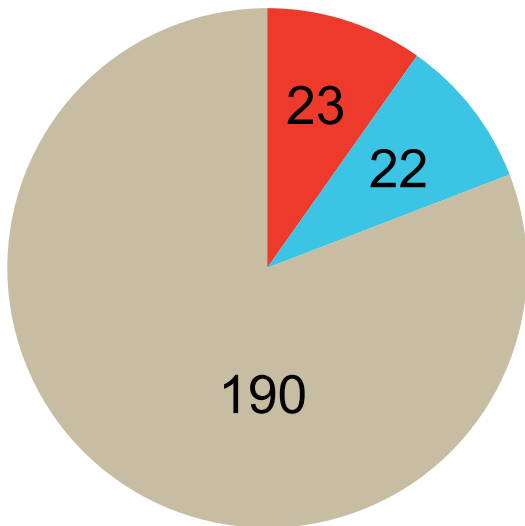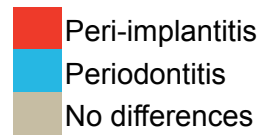

# Supplementary Figure S2

**(a)**

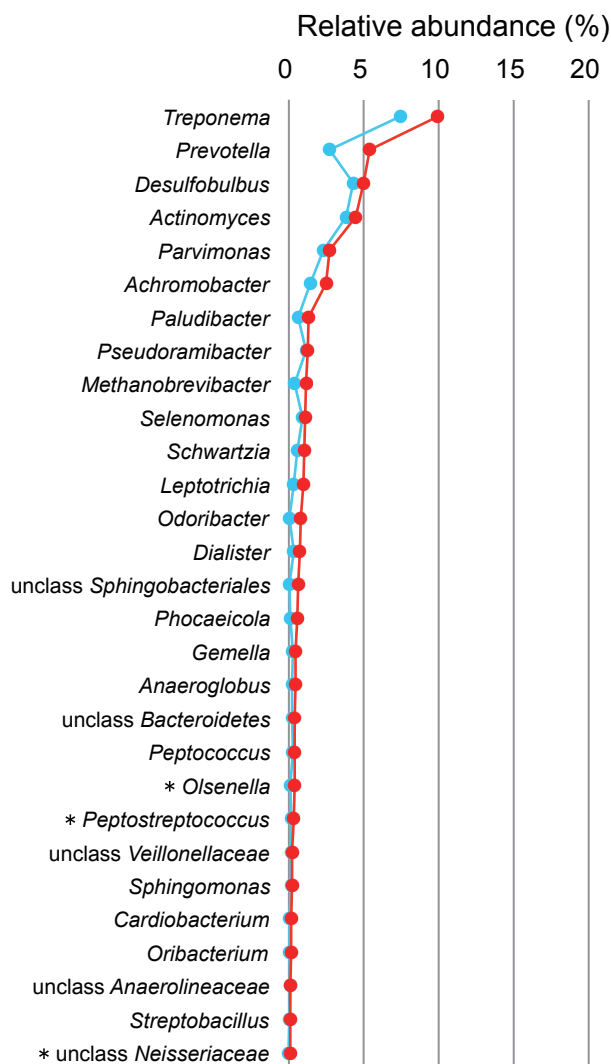

● Peri-implantitis  
● Periodontitis

**(b)**

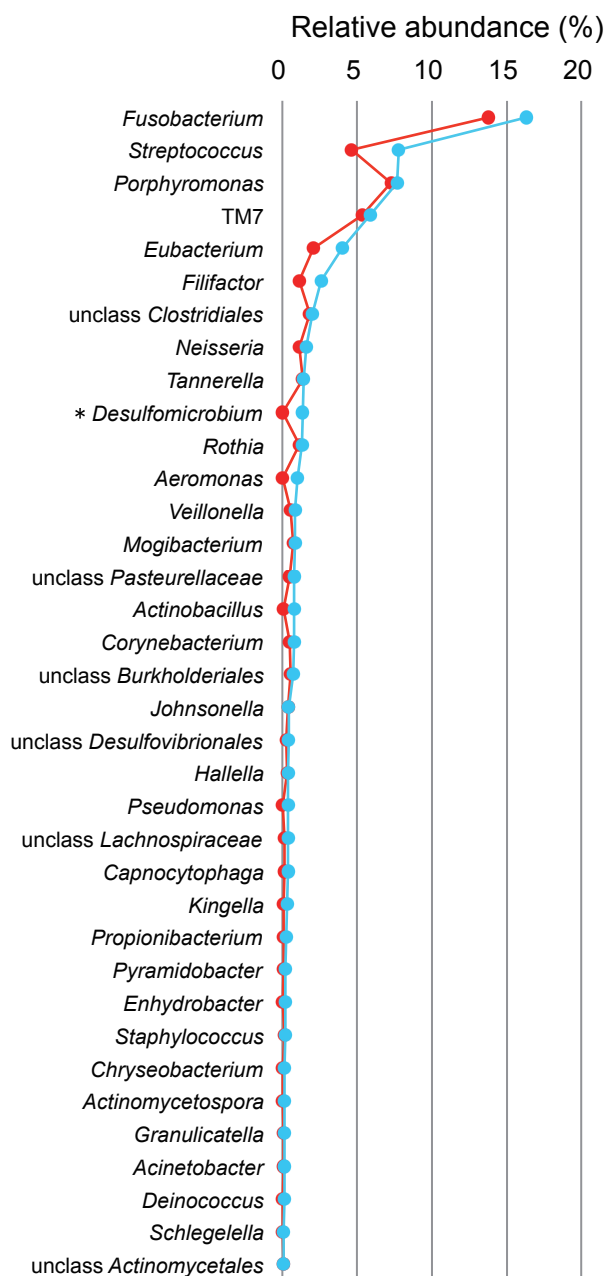

**(a)**

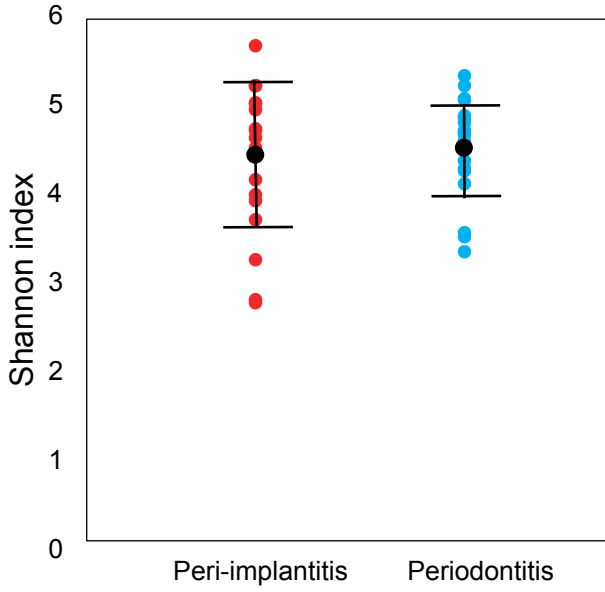

**(b)**

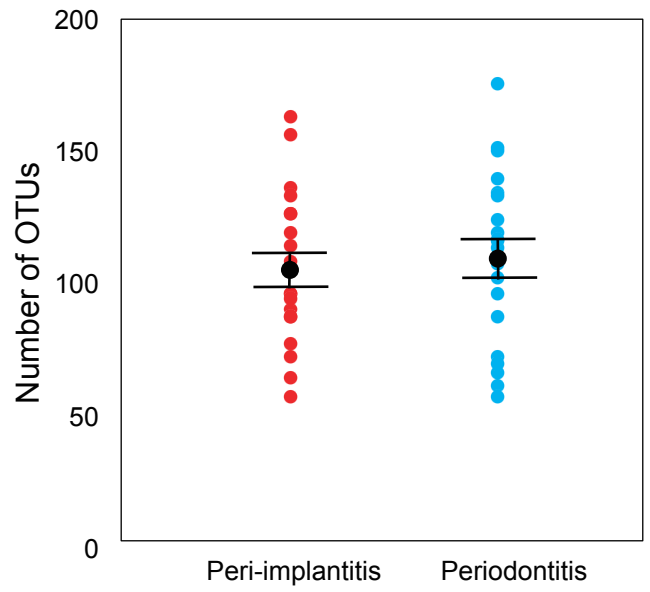

**(c)**

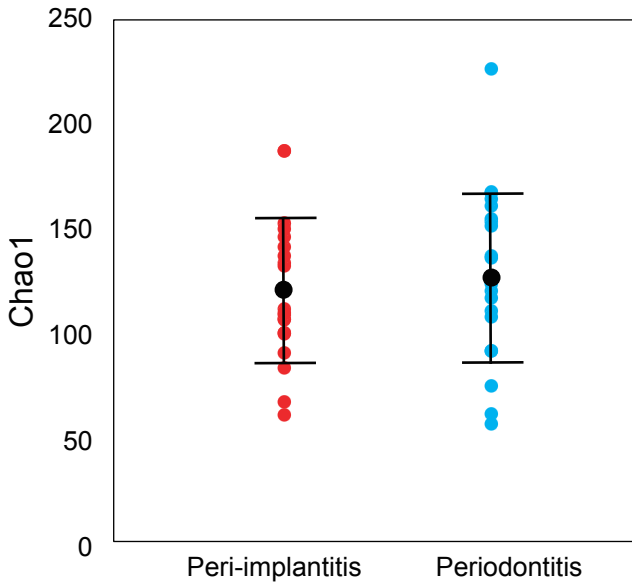

**(d)**

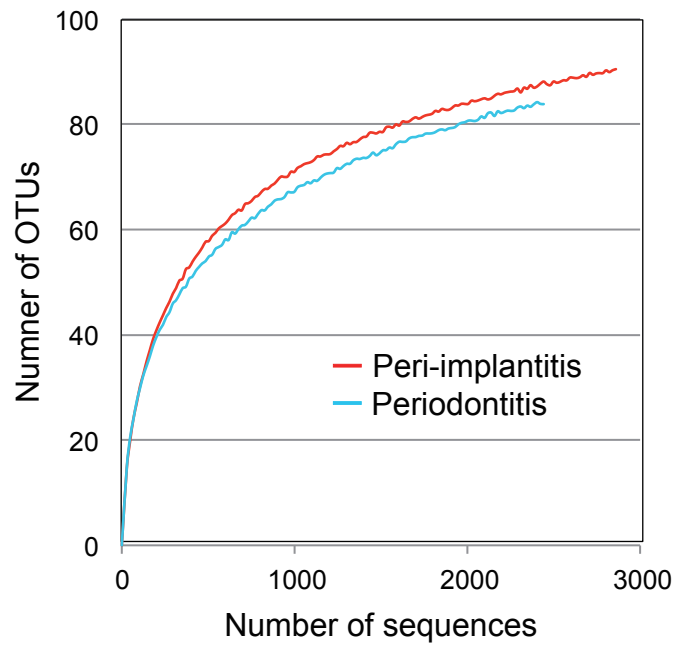

**(a)**

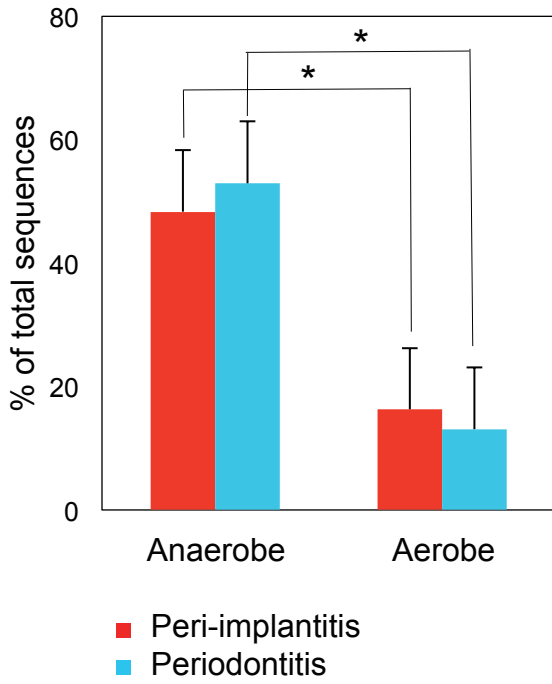

**(b)**

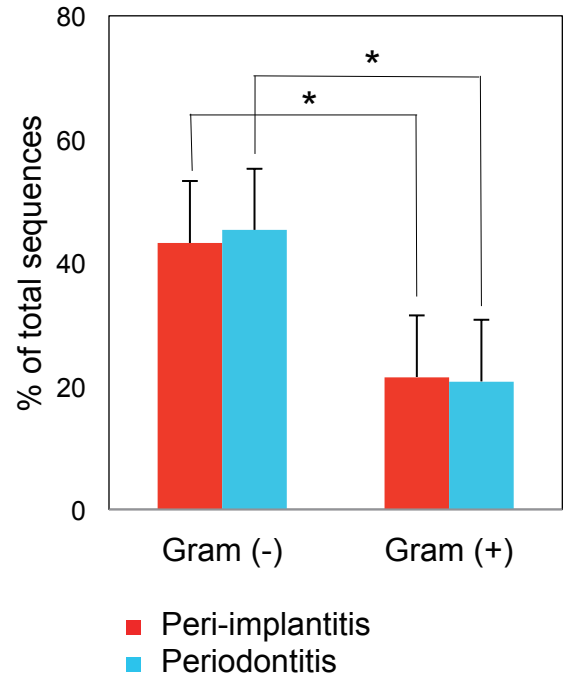

**(c)**

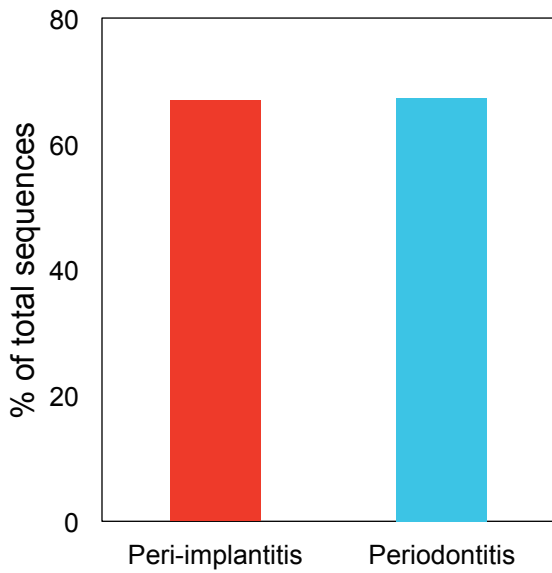

**Supplementary Table S1. Number of sequence reads and alpha diversity indexes in each sample.**

|                | Peri-implantitis  | Periodontitis     | <i>P</i> value <sup>a</sup> |
|----------------|-------------------|-------------------|-----------------------------|
| Raw reads      | 12183.5 ± 2408.68 | 15315.3 ± 1976.41 | 0.30                        |
| Analyzed reads | 9508.3 ± 1966.71  | 12307.7 ± 1688.73 | 0.26                        |
| OTUs           | 104.8 ± 6.49      | 109 ± 7.40        | 0.70                        |
| Shannon index  | 4.41 ± 0.82       | 4.49 ± 0.54       | 0.67                        |
| Chao1          | 120.55 ± 34.18    | 126.40 ± 40.27    | 0.65                        |

Numbers shown are mean ± s.d.

<sup>a</sup> Statistical differences were calculated using paired t-tests.



**Supplementary Table S2. The cultivated status, gram staining and oxygen requirements of the species in each sample.**

| Microbial characteristics  | Peri-implantitis | Periodontitis | <i>P</i> value <sup>c</sup> |
|----------------------------|------------------|---------------|-----------------------------|
| Cultivated <sup>a</sup>    | 66.87 ± 3.99     | 67.25 ± 3.58  | 0.90                        |
| Gram negative <sup>b</sup> | 43.16 ± 3.75     | 45.27 ± 3.48  | 0.58                        |
| Gram positive <sup>b</sup> | 21.46 ± 6.49     | 20.75 ± 2.52  | 0.79                        |
| Anaerobe <sup>b</sup>      | 48.34 ± 3.27     | 52.93 ± 3.43  | 0.28                        |
| Aerobe <sup>b</sup>        | 16.28 ± 3.39     | 13.09 ± 2.57  | 0.46                        |

Numbers shown are mean ± s.d.

<sup>a</sup> Bacterial cultivated status are based on HOMD.

<sup>b</sup> Gram stain and oxygen requirement were based on NCBI Entrez Genome Project database.

<sup>c</sup> Statistical differences were calculated using paired t-tests.

**Supplementary Table S3. The correlations between clinical parameters and alpha biodiversity indexes or microbial characteristics.**

|                            | Peri-implantitis |                    |                  |                  |        |           | Periodontitis |                  |                  |           |
|----------------------------|------------------|--------------------|------------------|------------------|--------|-----------|---------------|------------------|------------------|-----------|
|                            | Smoking          | Years <sup>c</sup> | PPD <sup>d</sup> | CAL <sup>e</sup> | Pus    | Bone loss | Smoking       | PPD <sup>d</sup> | CAL <sup>e</sup> | Bone loss |
| OTUs                       | -0.009           | -0.089             | -0.015           | -0.071           | -0.044 | 0.113     | -0.057        | 0.074            | 0.099            | -0.217    |
| Shannon index              | 0.057            | -0.059             | -0.046           | -0.069           | -0.026 | 0.029     | -0.265        | -0.197           | -0.002           | -0.208    |
| Chao 1                     | 0.076            | 0.041              | 0.006            | -0.023           | -0.026 | 0.115     | 0.000         | 0.039            | 0.039            | -0.272    |
| Cultivated <sup>a</sup>    | 0.246            | -0.377             | -0.014           | -0.012           | -0.026 | -0.005    | 0.265         | -0.050           | -0.065           | 0.041     |
| Gram negative <sup>b</sup> | 0.170            | -0.187             | 0.229            | 0.191            | 0.061  | 0.268     | 0.000         | -0.176           | -0.105           | -0.009    |
| Gram positive <sup>b</sup> | 0.057            | -0.217             | -0.443           | -0.432           | -0.218 | -0.546    | 0.170         | -0.020           | -0.058           | 0.050     |
| Anaerobe <sup>b</sup>      | 0.114            | 0.029              | -0.074           | -0.144           | -0.113 | -0.063    | 0.114         | 0.074            | -0.047           | -0.008    |
| Aerobe <sup>b</sup>        | 0.170            | -0.470             | -0.201           | -0.193           | -0.113 | -0.250    | 0.076         | -0.400           | -0.179           | -0.148    |

Correlations were given as Spearman's rank correlations.

<sup>a</sup> Bacterial cultivated status are based on HOMD.

<sup>b</sup> Gram stain and oxygen requirement are based on NCBI Entrez Genome Project database.

<sup>c</sup> The years of implant placement.

<sup>d</sup> Probing pocket depth.

<sup>e</sup> Clinical attachment loss.

**Supplementary Table S4. The species correlated to smoking or years of implant placement.**

| Species <sup>a</sup>                                 | Peri-implantitis |                    | Periodontitis |
|------------------------------------------------------|------------------|--------------------|---------------|
|                                                      | Smoking          | Years <sup>b</sup> | Smoking       |
| <i>Actinomyces</i> sp.   HOT-848                     | 0.508            | 0.051              | 0.508*        |
| <i>Lachnospiraceae</i> [G-1] sp.   HOT-496           | 0.501*           | -0.517*            |               |
| <i>Oribacterium</i> sp.   HOT-372                    | -0.541*          | 0.181              | -0.021        |
| <i>Peptostreptococcaceae</i> [XI][G-3] sp.   HOT-495 | -0.269           | 0.551*             | 0.238         |
| <i>Selenomonas</i> sp.   HOT-134                     | 0.095            | 0.166              | -0.513*       |
| <i>Streptococcus salivarius</i>                      | 0.155            | -0.644*            | 0.099         |
| <i>Streptococcus sanguinis</i>                       | 0.104            | -0.588*            | 0.000         |

Correlations were given as Spearman's rank correlations.

\* $P < 0.05$  and  $q < 0.1$ .

Blank means no detection of the bacteria.

<sup>a</sup> Species name and HOT (Oral Taxon ID) are based on HOMD.

<sup>b</sup> The years of implant placement.

**Supplementary Table S5. The species positively correlated to progression of peri-implantitis or periodontitis.**

| Taxonomic name <sup>a</sup>                   | Peri-implantitis |                  |        |           | Periodontitis    |                  |           |
|-----------------------------------------------|------------------|------------------|--------|-----------|------------------|------------------|-----------|
|                                               | PPD <sup>b</sup> | CAL <sup>c</sup> | Pus    | Bone loss | PPD <sup>b</sup> | CAL <sup>c</sup> | Bone loss |
| <i>Catonella morbi</i>                        | 0.673*           | 0.597*           | 0.335  | 0.546*    | 0.201            | 0.203            | 0.099     |
| <i>Clostridiales</i> [F-1][G-1] sp.   HOT-093 | 0.504*           | 0.421            | 0.447* | 0.562*    | 0.048            | 0.310            | -0.078    |
| <i>Eubacterium nodatum</i>                    | 0.441            | 0.585*           | 0.549* | 0.487*    | 0.301            | 0.219            | -0.038    |
| <i>Peptococcus</i> sp.   HOT-168              | 0.311            | 0.529*           | 0.571* | 0.547*    | 0.179            | 0.062            | -0.207    |
| <i>Treponema</i> sp.   HOT-257                | 0.611*           | 0.646*           | 0.447* | 0.644*    | 0.081            | 0.107            | -0.147    |

Correlations were given as Spearman's rank correlations.

\* $P < 0.05$  and  $q < 0.1$ .

<sup>a</sup> Species name and HOT (Oral Taxon ID) are based on HOMD.

<sup>b</sup> Probing pocket depth.

<sup>c</sup> Clinical attachment loss.

**Supplementary Table S6. The species negatively correlated to progression of peri-implantitis or periodontitis.**

| Taxonomic name <sup>a</sup>               | Peri-implantitis |                  |         |           | Periodontitis    |                  |           |
|-------------------------------------------|------------------|------------------|---------|-----------|------------------|------------------|-----------|
|                                           | PPD <sup>b</sup> | CAL <sup>c</sup> | Pus     | Bone loss | PPD <sup>b</sup> | CAL <sup>c</sup> | Bone loss |
| <b><i>Capnocytophaga gingivalis</i></b>   | -0.551*          | -0.471           | -0.168  | -0.238    | 0.269            | 0.362            | 0.040     |
| <b><i>Corynebacterium matruchotii</i></b> | -0.407           | -0.502*          | -0.413  | -0.576*   | -0.228           | 0.021            | -0.031    |
| <i>Eubacterium saburreum</i>              | -0.696*          | -0.758*          | -0.644* | -0.661*   | 0.211            | 0.065            | -0.026    |
| <i>Filifactor alocis</i>                  | 0.364            | 0.360            | 0.235   | 0.336     | -0.263           | -0.161           | -0.560*   |
| <i>Granulicatella adiacens</i>            | -0.529*          | -0.535*          | -0.411  | -0.430    | -0.043           | -0.055           | 0.119     |
| <i>Leptotrichia wadei</i>                 | -0.452*          | -0.516*          | -0.503* | -0.422*   | 0.141            | 0.028            | 0.057     |
| <i>Porphyromonas</i> sp.   HOT-279        | -0.197           | -0.200           | -0.086  | -0.423    | -0.122           | -0.176           | -0.594*   |
| <i>Propionibacterium acnes</i>            | -0.100           | -0.161           | -0.093  | -0.121    | -0.531*          | -0.464*          | -0.338    |
| <i>Selenomonas noxia</i>                  | -0.624*          | -0.619*          | -0.395  | -0.604*   | 0.214            | 0.034            | 0.014     |
| <i>Solobacterium moorei</i>               | -0.488*          | -0.502*          | -0.449* | -0.337    | 0.101            | -0.070           | -0.065    |
| <b><i>Streptococcus oralis</i></b>        | -0.525*          | -0.633*          | -0.566* | -0.651*   | -0.340           | -0.135           | 0.053     |
| <i>Veillonella parvula</i>                | -0.460*          | -0.537*          | -0.497* | -0.550*   | -0.387           | -0.436           | -0.249    |

Correlations were given as Spearman's rank correlations.

\* $P < 0.05$  and  $q < 0.1$ .

<sup>a</sup> Species name and HOT (Oral Taxon ID) are based on HOMD.

Aerobic/facultative bacteria are indicated in bold.

<sup>b</sup> Probing pocket depth

<sup>c</sup> Clinical attachment loss.

**Supplementary Table S7. Significantly different bacteria of peri-implantitis compared to those of periodontitis from another studies.**

| Kumar,P.S. <i>et al.</i> 2012 (Periodontitis/Peri-implantitis)    |                             |                                    |                             |
|-------------------------------------------------------------------|-----------------------------|------------------------------------|-----------------------------|
| Low                                                               | <i>P</i> value <sup>a</sup> | High                               | <i>P</i> value <sup>a</sup> |
| <i>Prevotella</i>                                                 | <0.05                       | <i>Treponema</i>                   | <0.001                      |
| <i>Lactobacillus</i>                                              | <0.05                       | <i>Streptococcus mutans</i>        | <0.001                      |
| <i>Leptotrichia</i>                                               | <0.01                       | <i>Butyrivibrio</i>                | <0.001                      |
| <i>Actinomyces</i>                                                | <0.01                       | <i>Campylobacter</i>               | <0.05                       |
|                                                                   |                             | <i>Eubacterium</i>                 | <0.01                       |
|                                                                   |                             | <i>Peptococcus</i>                 | <0.01                       |
| Dabdoub,S.M. <i>et al.</i> 2013 (Diseased tooth/Diseased implant) |                             |                                    |                             |
| Low                                                               | <i>P</i> value <sup>a</sup> | High                               | <i>P</i> value <sup>a</sup> |
| <i>Actinomyces meyeri</i>                                         | <0.05                       | <i>Staphylococcus pettenkoferi</i> | <0.05                       |
|                                                                   |                             | <i>Hylemonella</i> spp.            | <0.05                       |
|                                                                   |                             | <i>Staphylococcus hominis</i>      | <0.05                       |
|                                                                   |                             | <i>Prevotella baroniaer</i>        | <0.05                       |
|                                                                   |                             | <i>Streptococcus agalactiae</i>    | <0.05                       |
|                                                                   |                             | <i>Atopobium rimaes</i>            | <0.05                       |
|                                                                   |                             | <i>Prevotella oralis</i>           | <0.05                       |
|                                                                   |                             | <i>Megasphaera elsdenii</i>        | <0.05                       |
|                                                                   |                             | <i>Prevotella loescheii</i>        | <0.05                       |
|                                                                   |                             | <i>Aggregatibacteraphrophilus</i>  | <0.05                       |
|                                                                   |                             | <i>Arthrobacter</i> spp.           | <0.05                       |
|                                                                   |                             | <i>Campylobacter sputorum</i>      | <0.05                       |
|                                                                   |                             | <i>Streptococcus parasanguinis</i> | <0.05                       |
|                                                                   |                             | <i>Clostridium botulinum</i>       | <0.05                       |
|                                                                   |                             | Unclassified Methylobacteriaceae   | <0.05                       |
|                                                                   |                             | <i>Neisseria elongata</i>          | <0.05                       |

<sup>a</sup> Statistical differences were calculated using paired t-tests.
